# Supplementary material for: Selection of a DNA aptamer for cadmium detection based on cationic polymer mediated aggregation of gold nanoparticles
Source: Royal Society of Chemistry journal article supplement (doi:10.1039/c3an02117c), 2013-12-16
Supplement: c3an02117c.pdf [file c3an02117c.pdf]

# Selection of a DNA aptamer for cadmium detection based on cationic polymer mediated aggregation of gold nanoparticles

Yuangeng Wu,<sup>‡a,b</sup> Shenshan Zhan,<sup>‡a</sup> Lumei Wang<sup>a</sup> and Pei Zhou<sup>\*a</sup>

<sup>a</sup> Key Laboratory of Urban Agriculture (South), Ministry of Agriculture; School of Environmental Science and Engineering, Shanghai Jiao Tong University, Shanghai 200240, P. R. China. Fax: +86-21-34205762; Tel: +86-21-34205762; E-mail: zhoupei@sjtu.edu.cn

<sup>b</sup> Guizhou Province Key Laboratory of Fermentation Engineering and Biopharmacy; School of Liquor & Food Engineering, Guizhou University, Guiyang, 550025, Huaxi District, Guizhou, P. R. China

‡ These authors contributed equally to this work.

## Electronic Supplementary Information

Supplementary figures:

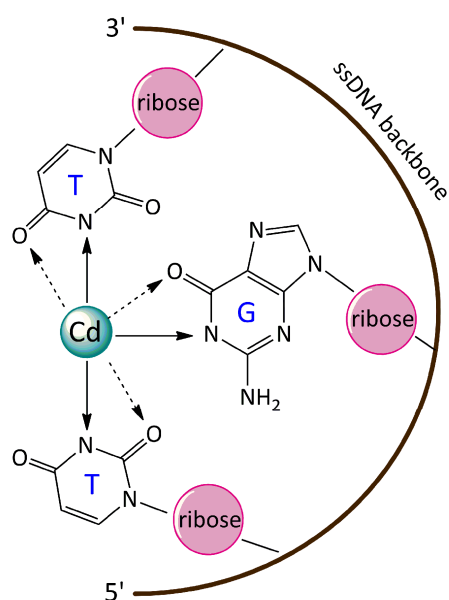

Fig. S1 One of the supposed structure of Cd(II)-aptamer binding interaction. The structure is maintaining by the coordination bonds between Cd(II) and the O or N of the adjacent T or G bases among the selected aptamer candidates.

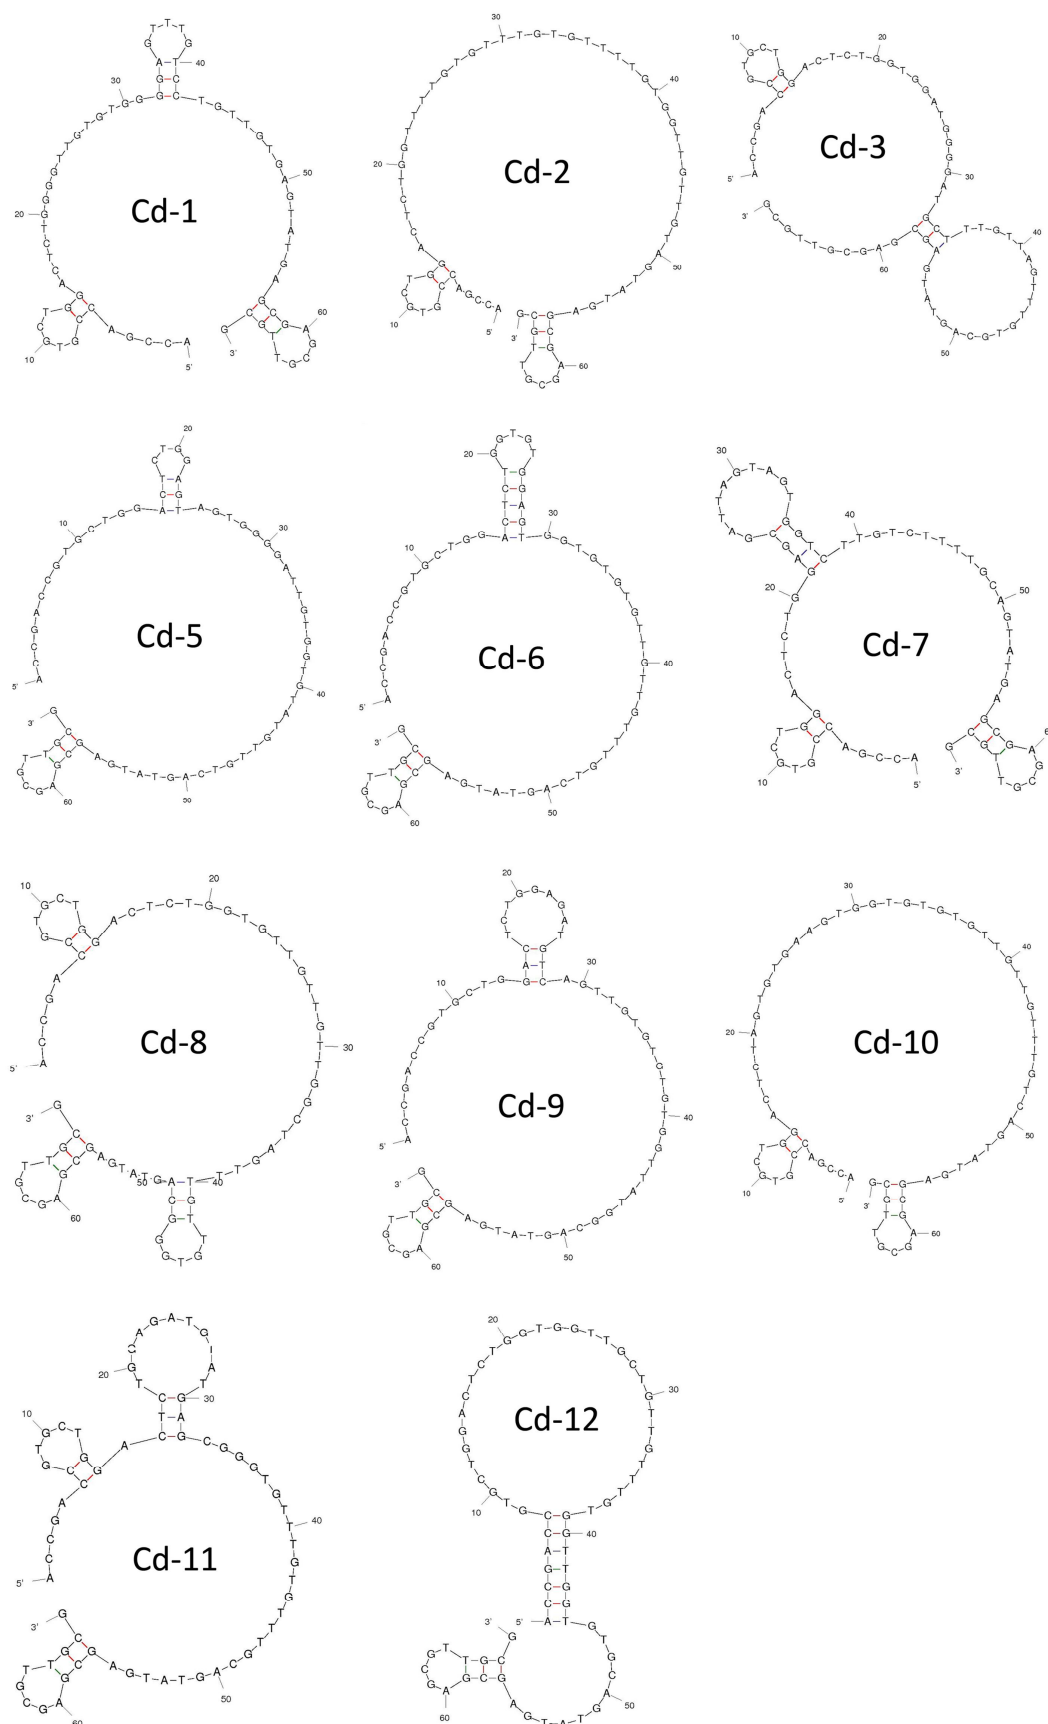

Fig. S2 Secondary structure of the selected ssDNA aptamers predicted using *Mfold* software.

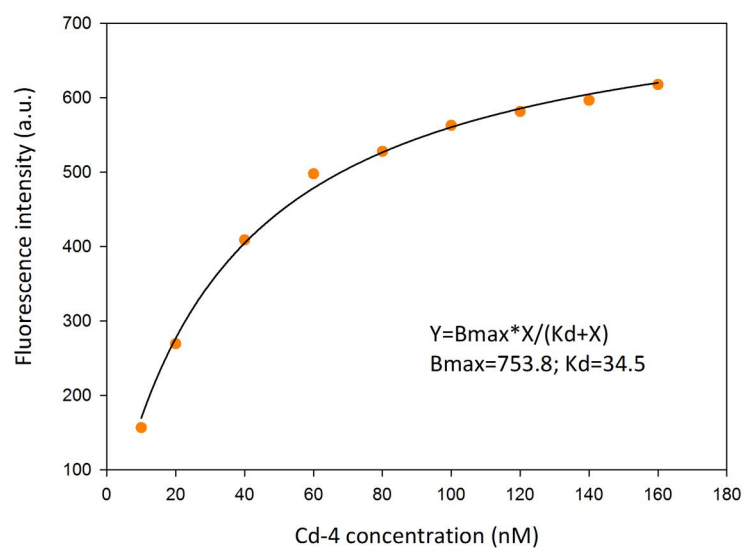

Fig. S3 The relationship between fluorescence intensities and concentration of FAM-labelled Cd-4 aptamer. The  $K_d$  value of Cd-4 aptamer bound to Cd(II) was calculated as 34.5 nM by fluorescence measurements.

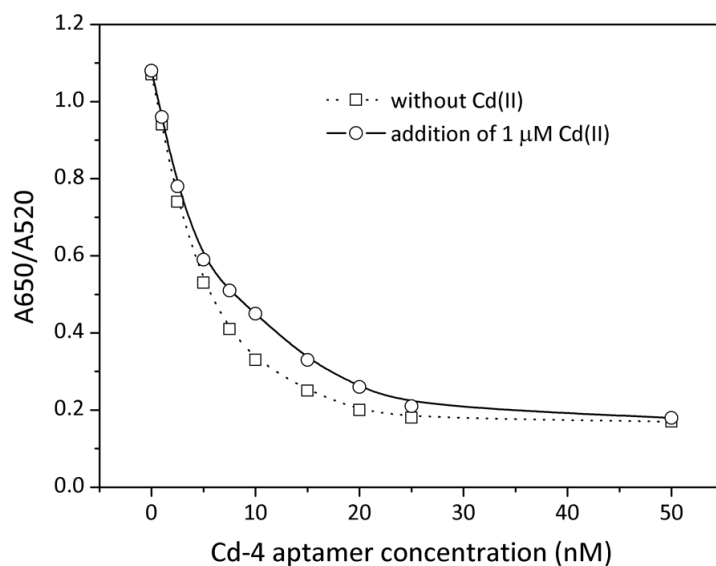

Fig. S4 Effect of Cd-4 aptamer concentration on the aggregation of AuNPs by 1.52 nM of PDDA.

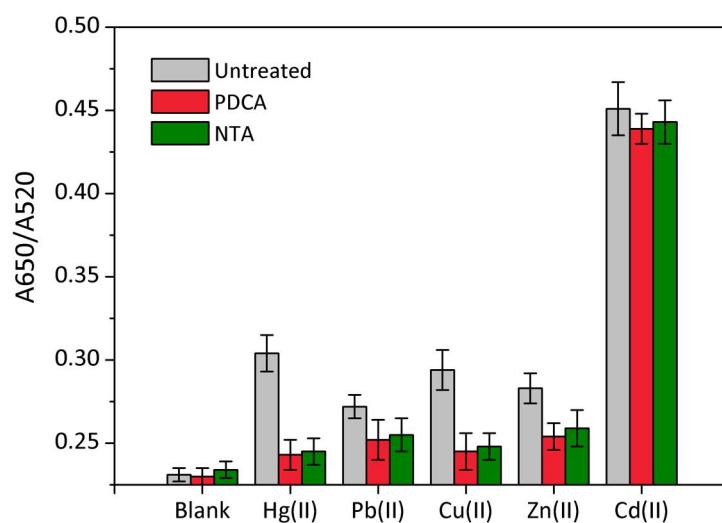

Fig. S5 Improving the selectivity of the assay toward Cd(II) by the addition of 5 μM chelating ligands. The concentrations of metal ions are all 1 μM. The chelating ligands are 2,6-pyridinedicarboxylic acid (PDCA) and nitrilotracetic acid (NTA), respectively.
